# Supplementary material for: Profiling Glioblastoma Cases with an Expression of DCX, OLIG2 and NES
Source: MDPI journal article supplement (doi:10.3390/ijms222413217), 2021-12-08
Supplement: s1 [file s1]

### Supplementary materials

## Profiling Glioblastoma Cases with an Expression of DCX, OLIG2 and NES

### Supplementary Materials:

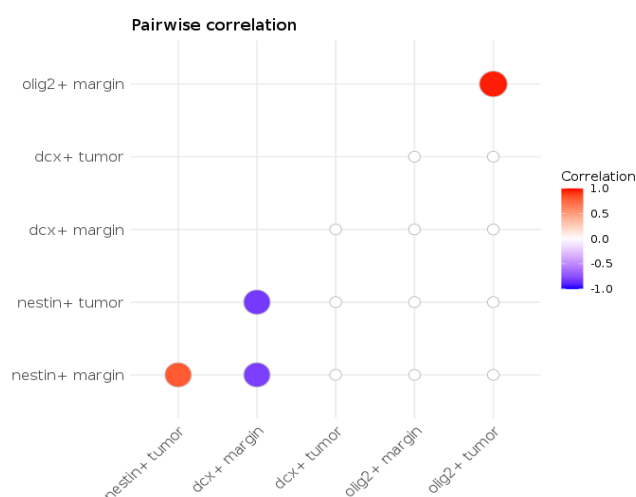

**Figure S1.** Pairwise correlation of margins and tumor sites adjacent to margins.

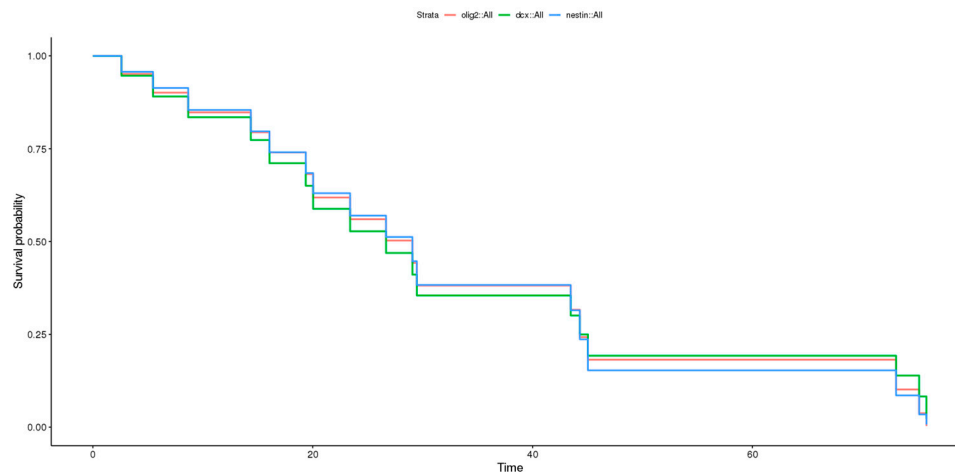

**Figure S2.** Survival changes concerning the frequency of studied antigens-positive cells.

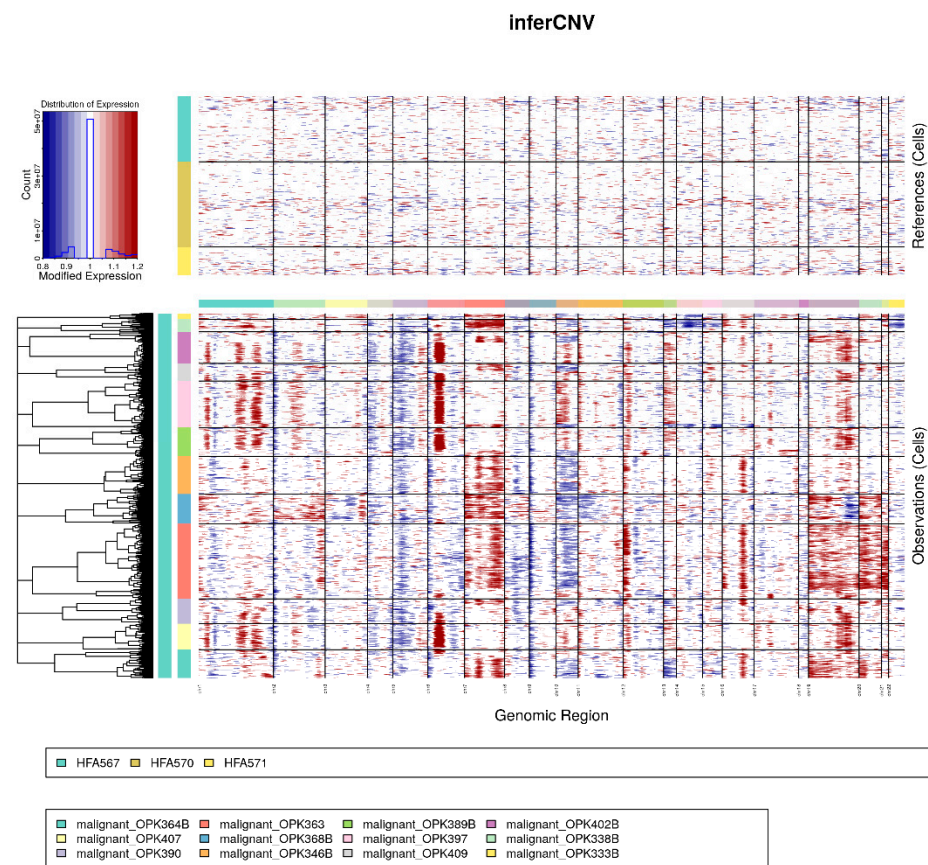

**Figure S3.** Predicted Copy Number Variations among the single cells from the malignant and fetal origin. The clustered score of genomic regions duplications (red) or loss (blue) had been shown.

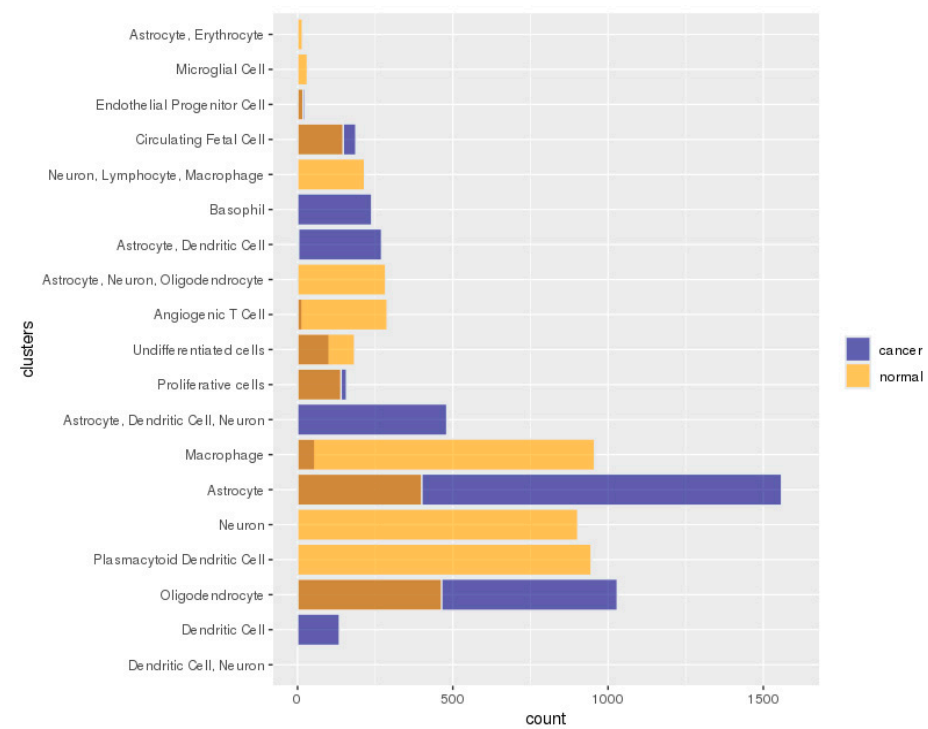

**Figure S4.** The histogram shows the cells’ distribution into the clusters according to the ‘cancer’ and ‘normal’ annotations.
